# Supplementary material for: Molecular Classification and Interpretation of Amyotrophic Lateral Sclerosis Using Deep Convolution Neural Networks and Shapley Values
Source: Preprints.org preprint supplement (doi:10.20944/preprints202110.0059.v1), 2021-10-04
Supplement: Supplementary file 2 [file supplementary]

## Sheet: Sheet1
Supplementary: Molecular classification and interpretation of amyotrophic lateral sclerosis using deep convolution neural networks and shapely values
Table S1: Principal investigators of the NYGC ALS Consortium.
Site	PI Name	Preferred Email
Center for Genomics of Neurodegenerative Disease (CGND), New York Genome Center, New York, NY	Hemali Phatnani, PhD	hphatnani@nygenome.org
Department of Neurology, Lewis Katz School of Medicine, Temple University, Philadelphia, PA	Justin Kwan, MD	Justin.Kwan@tuhs.temple.edu
Cedars-Sinai Department of Biomedical Sciences, Board of Governors Regenerative Medicine Institute and Brain Program, Cedars-Sinai Medical Center, and Department of Medicine, University of California, Los Angeles, CA	Dhruv Sareen, PhD	Dhruv.Sareen@cshs.org
Department of Biochemistry and Molecular Biology, Penn State Institute for Personalized Medicine, The Pennsylvania State University, Hershey, PA	James R. Broach, PhD	jbroach@hmc.psu.edu
Department of Neurology, The Pennsylvania State University, Hershey, PA	Zachary Simmons, MD	zsimmons@psu.edu
Department of Neurology, Henry Ford Health System, Detroit, MI	Ximena Arcila-Londono, MD	Xarcila1@hfhs.org
Department of Pathology and Laboratory Medicine, Perelman School of Medicine, University of Pennsylvania, Philadelphia, PA	Edward B. Lee, MD, PhD	edward.lee@uphs.upenn.edu
Department of Pathology and Laboratory Medicine, Perelman School of Medicine, University of Pennsylvania, Philadelphia, PA	Vivianna M. Van Deerlin, MD, PhD	vivianna@upenn.edu
Department of Neurology, Center for Motor Neuron Biology and Disease, Institute for Genomic Medicine, Columbia University, New York, NY	Neil A. Shneider, MD, PhD	ns327@cumc.columbia.edu
Department of Biological Engineering, Massachusetts Institute of Technology, Cambridge, MA	Ernest Fraenkel, PhD	fraenkel-admin@mit.edu
Department of Neurology, Johns Hopkins School of Medicine, Baltimore, MD	Lyle W. Ostrow, MD, PhD	lostrow1@jhmi.edu
Department of Neurogenetics, Academic Medical Centre, Amsterdam and Leiden University Medical Center, Leiden, The Netherlands	Frank Baas, MD, PhD	f.baas@amc.uva.nl
Department of Medicine, Lung Biology Center, University of California, San Francisco, CA	Noah Zaitlen, PhD	Noah.zaitlen@ucsf.edu
ALS Multidisciplinary Clinic, Neuromuscular Division, Department of Neurology, Harvard Medical School, and Neurological Clinical Research Institute, Massachusetts General Hospital, Boston, MA	James D. Berry, MD, MPH	jdberry@mgh.harvard.edu
Centre for Neuroscience and Trauma, Blizard Institute, Barts and The London School of Medicine and Dentistry, Queen Mary University of London, London, and Department of Neurology, Basildon University Hospital, Basildon, United Kingdom	Andrea Malaspina, MD, PhD	a.malaspina@qmul.ac.uk
Institute of Neurology, National Hospital for Neurology and Neurosurgery, University College London, London, United Kingdom	Pietro Fratta, MD, PhD	p.fratta@ucl.ac.uk
The Jackson Laboratory, Bar Harbor, ME	Gregory A. Cox, PhD	greg.cox@jax.org
Department of Psychiatry & Human Behavior, Department of Biological Chemistry, School of Medicine, and Department of Neurobiology and Behavior, School of Biological Sciences, University California, Irvine, CA	Leslie M. Thompson, PhD	lmthomps@uci.edu
Taube/Koret Center for Neurodegenerative Disease Research, Roddenberry Center for Stem Cell Biology and Medicine, Gladstone Institute	Steve Finkbeiner, MD, PhD	steve.finkbeiner@gladstone.ucsf.edu
Department of Neurology & Sensory Organs, University of Thessaly, Thessaly, Greece	Efthimios Dardiotis, MD, PhD	edar@med.uth.gr
Department of Neurology ,Washington University in St. Louis, St. Louis, MO	Timothy M. Miller, MD, PhD	millert@neuro.wustl.edu
Centre for Clinical Brain Sciences, Anne Rowling Regenerative Neurology Clinic, Euan MacDonald Centre for Motor Neurone Disease Research, University of Edinburgh, Edinburgh, United Kingdom	Siddharthan Chandran, PhD	siddharthan.chandran@ed.ac.uk
Centre for Clinical Brain Sciences, Anne Rowling Regenerative Neurology Clinic, Euan MacDonald Centre for Motor Neurone Disease Research, University of Edinburgh, Edinburgh, United Kingdom	Suvankar Pal, MD	Suvankar.Pal@ed.ac.uk
Department of Molecular Genetics, Weizmann Institute of Science, Rehovot, Israel	Eran Hornstein, MD, PhD	eran.hornstein@weizmann.ac.il
Department of Neurology, Icahn School of Medicine at Mount Sinai, New York, NY	Daniel J. MacGowan, MD	Daniel.MacGowan@mountsinai.org
Center for Neurodegenerative Disorders, Department of Neurology, the Lewis Katz School of Medicine, Temple University, Philadelphia, PA	Terry Heiman-Patterson, MD	Terry.Heiman-Patterson@tuhs.temple.edu
Cold Spring Harbor Laboratory, Cold Spring Harbor, NY	Molly G. Hammell, PhD	mhammell@cshl.edu
Computer Science and Systems Biology Program, Ann Romney Center for Neurological Diseases, Department of Neurology and Division of Genetics in Department of Medicine, Brigham and Women’s Hospital, Boston, MA, Harvard Medical School, Boston, MA, and Program in Medical and Population Genetics, Broad Institute, Cambridge, MA	Nikolaos. A. Patsopoulos, MD, PhD	npatsopoulos@rics.bwh.harvard.edu
Ann Romney Center for Neurologic Diseases, Brigham and Women's Hospital, Harvard Medical School, Boston, MA	Oleg Butovsky, PhD	obutovsky@rics.bwh.harvard.edu
Department of Anesthesiology, Stony Brook University, Stony Brook, NY	Joshua Dubnau, PhD	joshua.dubnau@stonybrook.edu
Section of Infections of the Nervous System, National Institute of Neurological Disorders and Stroke, NIH, Bethesda, MD	Avindra Nath, MD	natha@ninds.nih.gov
Department of Neurology, Barrow Neurological Institute, St. Joseph's Hospital and Medical Center, Department of Neurobiology, Barrow Neurological Institute, St. Joseph's Hospital and Medical Center, Phoenix, AZ	Robert Bowser, PhD	Robert.Bowser@Barrowneuro.org
Department of Neurology, Division of Neuromuscular Medicine, Columbia University, New York, NY	Matt Harms, MD	mh3607@cumc.columbia.edu
Department of Neuropathology, Academic Medical Center, University of Amsterdam, Amsterdam, The Netherlands	Eleonora Aronica, MD, PhD	e.aronica@amc.uva.nl
Department of Biology and Veterinary and Biomedical Sciences, The Pennsylvania State University, University Park, PA	Mary Poss, DVM, PhD	mposs@bx.psu.edu
New York Stem Cell Foundation, Department of Bioengineering, School of Engineering and Applied Sciences, University of Pennsylvania, Philadelphia, PA	Jennifer Phillips-Cremins, PhD	jcremins@seas.upenn.edu
Department of Pathology, Fishberg Department of Neuroscience, Friedman Brain Institute, Ronald M. Loeb Center for Alzheimer's Disease, Icahn School of Medicine at Mount Sinai, New York, NY	John Crary, MD, PhD	john.crary@mountsinai.org
Department of Neurology, Harvard Medical School, Neurological Clinical Research Institute, Massachusetts General Hospital, Boston, MA	Nazem Atassi, MD	NATASSI@mgh.harvard.edu
Department of Neurology, Hospital for Special Surgery and Weill Cornell Medical Center, New York, NY	Dale J. Lange, MD	LangeD@hss.edu
Medical Genetics, Atlantic Health System, Morristown Medical Center, Morristown, NJ, and Overlook Medical Center, Summit, NJ	Darius J. Adams, MD	Darius.Adams@atlantichealth.org
Center of Clinical Research, Experimental Surgery and Translational Research, Biomedical Research Foundation of the Academy of Athens (BRFAA), 4 Soranou Efesiou Street, 11527, Athens, Greece; 1st Department of Neurology, Eginition Hospital, Medical School, National and Kapodistrian University of Athens, Athens, Greece	Leonidas Stefanis, MD, PhD	lstefanis@bioacademy.gr
Neuromuscular/EMG service and ALS/Motor Neuron Disease Clinic , Hebrew University-Hadassah Medical Center, Jerusalem, Israel	Marc Gotkine, MD	marc@gotkine.com
Board of Governors Regenerative Medicine Institute, Los Angeles, CA; Department of Neurology, Cedars-Sinai Medical Center, Los Angeles, CA	Robert H. Baloh, MD. PhD	Robert.Baloh@csmc.edu
Neurological Clinical Research Institute, Massachusetts General Hospital, Boston, MA	Suma Babu, MBBS, MPH	SBABU@MGH.HARVARD.EDU
Departments of Neuroscience, and Genetics and Genomic Sciences, Ronald M. Loeb Center for Alzheimer's disease, Icahn School of Medicine at Mount Sinai, New York, NY	Towfique Raj, PhD	towfique.raj@mssm.edu
Harvard Medical School, Department of Physical Medicine & Rehabilitation, Spaulding Rehabilitation Hospital, Boston, MA	Sabrina Paganoni, MD, PhD	SPAGANONI@mgh.harvard.edu
Center for Cellular and Molecular Therapeutics, Children's Hospital of Philadelphia, Philadelphia, PA; Department of Genetics, Perelman School of Medicine, University of Pennsylvania, Philadelphia, PA	Ophir Shalem, PhD	shalemo@pennmedicine.upenn.edu
Centre for Clinical Brain Sciences, University of Edinburgh, Edinburgh, UK; Euan MacDonald Centre for Motor Neurone Disease Research, University of Edinburgh, Edinburgh, UK	Colin Smith, MD	Col.Smith@ed.ac.uk
Department of Genetics and Genomic Sciences, Icahn Institute of Data Science and Genomic Technology, Icahn School of Medicine at Mount Sinai, New York, NY	Bin Zhang, PhD	bin.zhang@mssm.edu
University of Maryland Brain and Tissue Bank and NIH NeuroBioBank
Department of Neuropathology, Georgetown Brain Bank, Georgetown Lombardi Comprehensive Cancer Center, Georgetown University Medical Center, Washington DC	Brent Harris, MD, PhD	bth@georgetown.edu
Department of Neurology, University of California San Francisco	Iris Broce, PhD	iris.broce@ucsf.edu
Table S2: Statistic of samples and tissue sources. The samples used in the studyare from multiple post-mortem tissues.
Tissue source	Sample number
Cerebellum	98
Cortex frontal	96
Cortex motor lateral	54
Cortex motor medial	58
Cortex motor unspecified	6
Cortex occipital	58
Spinal cord cervical	57
Spinal cord lumbar	52
Spinal cord thoracic	54
Others	17
Total	550
Figure S1: Distribution of RNA Integration Number (RIN) values in studied samples. The RINvalues range from 2.2 to 9.9, more than 30% of samples have RIN < 6.0
Table S3: List of genes identified by our machine learning pipeline as important for ALS
Gene Name
ABR
ATAT1
DRD4
FAM189A1
GOLGA2P10
LHCGR
SERF1A
SERF1B
SMN1
SMN2
STON1-GTF2A1L
TRIM27
